# Supplementary material
Source: publisher figshare collection journal article supplement (https://acs.figshare.com/ndownloader/files/4544377)
Supplement: Supplementary file 1 [file 4544377]

# PbS Cubes with Pyramidal Pits: An Example of Etching Growth

**Yanglong Hou,<sup>†,‡,\*</sup> Hiroshi Kondoh,<sup>‡</sup> and Toshiaki Ohta<sup>‡,¶</sup>**

<sup>†</sup> *Department of Advanced Materials and Nanotechnology, College of Engineering*

*Peking University, Beijing 100871, China*

<sup>‡</sup> *Department of Chemistry, School of Science, The University of Tokyo, Tokyo 113-0033, Japan*

<sup>¶</sup> *SR Center, Ritsumeikan University, Shiga 525-8577, Japan*

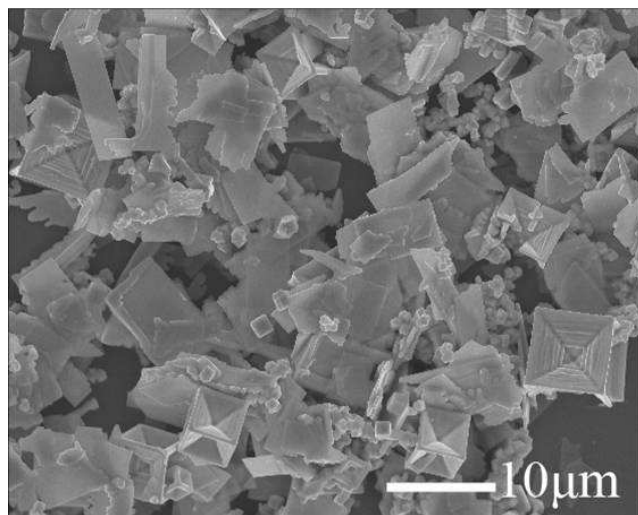

**Figure S1** A typical SEM image of the as-synthesized PbS tapes and cubes with pyramidal pits.

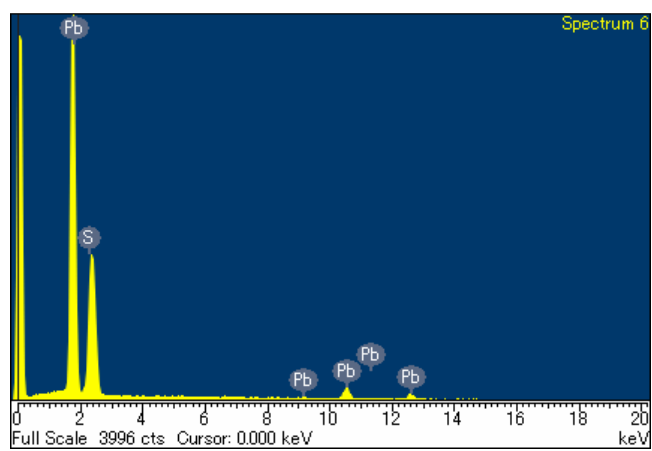

**Figure S2** Energy dispersive x-ray spectroscopy of PbS cubes, indicating the molar ratio of Pb:S  $\square$  51:49.
